# Supplementary material for: Do short-term ecological alterations affect fish diversity in the long-run? A study from a sub-tropical river in the Eastern Himalayas
Source: Research Square preprint supplement (doi:10.21203/rs.3.rs-7347029/v1), 2025-10-16
Supplement: Supplementary file 1 [file f3bf31dac896c6f0dbc84aed.docx]

**Supplementary Tables**

**Table S1**. Fish species recorded from River Siang, Arunachal Pradesh

| Family | Season | PRM | | | | | | MON | | | | | | POM | | | | | | IUCN Status | Remarks |
| --- | --- | --- | --- | --- | --- | --- | --- | --- | --- | --- | --- | --- | --- | --- | --- | --- | --- | --- | --- | --- | --- |
| Station | Pug | Yin | Bol | Kom | Pas | Oir | Pug | Yin | Bol | Kom | Pas | Oir | Pug | Yin | Bol | Kom | Pas | Oir |
| Danionidae | **Danio rerio* | + | + | + | - | + | + | - | + | - | - | + | + | + | + | + | + | + | + | LC | SIF |
|  | **Opsarius bendelisis* | + | + | + | + | + | + | + | + | + | + | + | + | + | + | + | + | + | + | LC | SIF |
|  | **Opsarius siangi* | + | + | + | + | + | + | + | + | + | + | + | - | + | + | + | + | + | + | LC | SIF |
|  | *Opsarius tileo* | - | + | + | + | + | + | + | + | + | + | + | + | + | + | + | + | + | + | LC | SIF |
|  | *Opsarius barna* | + | + | + | + | + | + | + | + | + | + | + | + | + | + | + | + | + | + | LC | SIF |
|  | **Barilius vagra* | + | + | + | + | + | + | + | + | + | + | + | + | + | + | + | + | + | + | LC | SIF |
|  | *Barilius barila* | + | + | + | + | + | + | + | + | + | + | + | + | + | + | + | + | + | + | LC | SIF |
|  | *Raiamas bola* | + | + | + | + | + | + | + | + | + | + | + | + | + | + | + | + | + | + | LC | SIF; Migratory |
|  | *Devario aequipinnatus* | - | - | + | + | + | + | - | - | + | - | + | + | - | + | + | + | + | + | LC | SIF |
|  | **Devario devario* | - | - | + | - | + | + | - | + | + | - | + | + | - | - | + | - | + | + | LC | SIF |
|  | *Cabdio jaya* | - | + | + | - | + | + | - | - | - | - | + | + | - | + | + | + | + | + | LC | SIF |
|  | **Cabdio morar* | - | - | - | - | + | + | - | - | - | - | + | + | - | - | - | - | + | + | LC | SIF |
|  | **Amblypharyngodon mola* | - | - | - | - | - | + | - | - | - | - | - | + | - | - | - | - | - | + | LC | SIF |
|  | *Rasbora rasbora* | - | - | - | - | + | + | - | - | - | - | - | + | - | - | - | - | + | + | LC | SIF |
|  | *Rasbora daniconius* | - | - | - | - | + | + | - | - | - | - | + | + | - | - | - | - | + | + | LC | SIF |
|  | *Esomus danrica* | - | + | + | - | + | + | - | + | - | - | + | + | - | + | + | - | + | + | LC | SIF |
|  | *Salmostoma bacaila* | - | + | - | - | - | + | - | - | - | - | + | + | - | + | - | - | - | + | LC | SIF |
| Cyprinidae | **Schizothorax richardsonii* | + | + | + | + | + | - | + | + | + | - | + | - | + | + | + | + | + | - | VU | Migratory |
|  | *Garra arunachalensis* | + | + | + | + | + | - | - | - | - | - | - | - | + | + | + | + | + | - | NE | SIF |
|  | **Garra elongata* | + | + | + | + | + | - | + | + | + | + | + | + | + | + | + | + | + | + | NT | SIF |
|  | **Garra birostris* | + | + | + | + | + | - | + | + | + | + | + | + | + | + | + | + | + | - | NE | SIF |
|  | **Systomus sarana* | - | - | - | - | - | + | - | - | - | - | - | + | - | - | - | - | - | + | LC | SIF |
|  | **Puntius sophore* | - | - | - | - | + | + | - | - | - | - | + | + | - | - | - | - | + | + | LC | SIF |
|  | **Puntius chola* | - | - | - | - | + | + | - | - | - | + | + | + | - | - | + | - | + | + | LC | SIF |
|  | **Pethia conchonius* | - | - | + | + | + | + | - | - | + | + | + | + | - | - | + | + | + | + | LC | SIF |
|  | *Pethia ticto* | - | - | - | - | + | + | - | - | - | - | + | + | - | - | - | - | + | + | LC | SIF |
|  | **Labeo gonius* | - | - | - | - | - | + | - | - | - | - | - | + | - | - | - | - | - | + | LC |  |
|  | **Labeo dyocheilus* | + | + | + | + | + | + | + | + | + | + | + | + | + | + | + | + | + | + | LC | Migratory |
|  | *Labeo catla* | - | - | - | - | - | - | - | - | - | - | - | - | - | - | - | - | - | + | LC |  |
|  | *Labeo rohita* | - | - | - | - | - | + | - | - | - | - | - | - | - | - | - | - | + | + | LC |  |
|  | **Semiplotus semiplotus* | + | + | + | + | + | + | + | + | + | + | + | + | + | + | + | + | + | + | VU | SIF; Migratory |
|  | *Neolissochilus hexagonolepis* | + | + | + | + | + | + | + | + | + | + | - | - | + | + | + | + | + | + | NT | Migratory |
|  | **Tor tor* | + | + | + | + | + | + | + | + | + | + | + | + | + | + | + | + | + | + | DD | Migratory |
|  | **Tor putitora* | + | + | + | + | + | + | + | + | + | + | + | - | + | + | + | + | + | + | EN | Migratory |
|  | *Cirrhinus mrigala* | - | - | - | - | - | + | - | - | - | - | - | - | - | - | - | - | - | + | LC |  |
|  | **Bangana dero* | + | + | + | + | + | + | + | + | + | + | + | + | + | + | + | + | + | + | LC | Migratory |
|  | **Tariqilabeo latius* | - | - | + | + | + | + | + | + | + | + | + | + | - | - | + | + | + | + | LC | SIF |
|  | *Chagunius chagunio* | - | - | - | - | + | + | - | - | - | - | - | + | - | - | - | - | + | + | LC | SIF |
| Xenocyprididae | **Ctenopharyngodon idella* | - | - | - | - | - | + | - | - | - | - | - | - | - | - | - | - | - | + | LC | Exotic |
| Botiidae | *Botia dario* | - | - | - | - | + | - | - | - | - | - | + | - | - | - | - | - | + | - | LC | SIF |
|  | *Botia rostrata* | - | - | + | - | - | - | - | - | - | - | - | - | - | - | + | - | + | - | VU | SIF |
| Nemacheilidae | **Paracanthocobitis botia* | - | + | - | - | + | + | - | - | - | - | + | + | - | + | - | - | + | + | LC | SIF |
|  | *Aborichthys elongatus* | + | + | + | - | + | - | - | - | - | - | + | - | + | + | + | + | + | - | LC | SIF |
|  | *Aborichthys kempi* | + | + | + | - | + | - | - | - | - | - | - | - | + | + | + | - | + | - | NT | SIF |
|  | *Schistura rupecula* | + | + | + | + | + | - | - | - | - | - | - | - | + | + | + | + | + | - | LC | SIF |
| Cobitidae | *Lepidocephalichthys guntea* | - | - | - | - | - | + | - | + | - | - | - | + | - | - | - | - | - | + | LC | SIF |
|  | *Lepidocephalichthys annandalei* | - | - | - | - | - | + | - | - | - | - | - | - | - | - | - | - | - | + | LC | SIF |
| Tetraodontidae | **Leiodon cutcutia* | - | - | - | - | - | + | - | - | - | - | - | + | - | - | - | - | - | + | LC | SIF |
| Ambassidae | **Parambassis baculis* | - | - | - | - | + | + | - | - | - | - | + | + | - | - | - | - | + | + | LC | SIF |
|  | **Chanda nama* | - | - | - | - | + | + | - | - | - | - | + | + | - | - | - | - | + | + | LC | SIF |
| Ritidae | **Rita rita* | - | - | - | - | + | + | - | - | - | - | + | + | - | - | - | - | + | + | LC | SIF |
| Bagridae | *Sperata aor* | - | - | - | - | - | + | - | - | - | - | - | + | - | - | - | - | - | + | LC |  |
|  | *Sperata seenghala* | - | - | - | - | - | + | - | - | - | - | - | - | - | - | - | - | - | + | LC |  |
|  | *Mystus tengara* | - | - | - | - | - | + | - | - | - | - | - | + | - | - | - | - | - | + | LC | SIF |
|  | *Mystus prabini* | - | - | - | - | + | + | - | - | - | - | - | + | - | - | - | - | + | + | NE | SIF |
|  | *Mystus cavasius* | - | - | - | - | + | + | - | - | - | - | - | + | - | - | - | - | + | + | LC | SIF |
|  | *Hemibagrus menoda* | - | - | - | - | - | - | - | - | - | - | - | - | - | - | - | - | - | + | LC | SIF |
| Ailiidae | **Eutropiichthys murius* | + | - | - | - | - | - | - | - | - | - | - | - | + | - | - | - | - | - | LC | SIF |
|  | *Eutropiichthys vacha* | - | + | + | + | + | + | - | - | - | - | + | + | - | + | + | + | + | + | LC | SIF |
|  | *Clupisoma garua* | - | - | - | - | + | + | - | - | - | - | + | + | - | - | - | - | + | + | LC | SIF |
|  | **Ailia coila* | - | - | - | - | + | + | - | - | - | - | - | + | - | - | - | - | - | + | NT | SIF |
| Siluridae | **Ompok bimaculatus* | - | - | - | - | + | + | - | - | - | - | + | + | - | - | - | - | + | + | NT | SIF |
|  | *Pterocryptis gangelica* | - | - | - | - | - | - | - | - | - | - | - | - | - | - | - | - | + | - | DD | SIF |
|  | *Wallago attu* | - | - | - | - | - | + | - | - | - | - | - | + | - | - | - | - | - | + | VU |  |
| Sisoridae | *Bagarius bagarius* | - | - | - | - | + | - | - | + | + | + | + | + | + | + | + | + | + | + | VU | Migratory |
|  | *Gagata gagata* | - | + | + | + | + | + | - | - | - | - | - | - | - | + | + | + | - | + | LC | SIF |
|  | *Gagata cenia* | - | - | - | - | - | + | - | - | - | - | - | + | - | - | - | - | - | + | LC | SIF |
|  | *Gagata sexualis* | - | - | - | - | - | - | - | - | - | - | - | - | - | - | - | - | + | - | LC | SIF |
|  | *Glyptothorax cavia* | + | + | + | + | + | - | - | - | - | - | - | - | + | + | + | + | + | - | LC | SIF |
|  | *Glyptothorax conirostris* | - | + | + | + | + | - | - | - | - | - | - | - | - | + | + | + | + | - | DD | SIF |
| Mastacembelidae | **Mastacembelus armatus* | - | - | - | - | + | + | - | - | - | - | + | + | - | - | - | - | + | + | LC |  |
| Anguillidae | *Anguilla bengalensis* | - | - | - | - | - | - | - | + | + | + | + | - | + | + | + | + | + | + | NT | Migratory |
| Belonidae | *Xenentodon cancila* | - | - | - | - | - | + | - | - | - | - | - | + | - | - | - | - | - | + | LC | SIF |
| Channidae | *Channa punctata* | - | - | - | - | - | + | - | - | - | - | - | - | - | - | - | - | - | + | LC | SIF |
|  | *Channa gachua* | - | - | + | + | + | + | - | - | - | - | + | + | - | - | + | + | + | + | LC | SIF |
|  | *Channa marulius* | - | - | - | - | - | + | - | - | - | - | - | + | - | - | - | - | - | + | LC |  |
|  | *Channa stewartii* | - | - | - | - | - | + | - | - | - | - | - | + | - | - | - | - | - | + | LC | SIF |
|  | *Channa striata* | - | - | - | - | - | + | - | - | - | - | - | + | - | - | - | - | - | + | LC |  |

*Species reported during 2017-18; +, present; -, absent

PRM, Pre-monsoon; MON, Monsoon; POM, Post-monsoon; Pug, Puging; Yin, Yingkiong; Bol, Boleng; Kom, Komsing; Pas, Pasighat; Oir, Oiramghat

LC, Least Concern; NT, Near Threatened; VU, Vulnerable; EN, Endangered; DD, Data Deficient; NE, Not Evaluated; SIF, Small indigenous fish

**Table S2**. Seasonal variation in diversity indices

| Year | Season | Hʹ | dʹ | Jʹ |
| --- | --- | --- | --- | --- |
| 2017-18 | PRM | 2.102±0.497ab | 3.021±1.209ab | 0.747±0.105a |
| MON | 2.420±0.230bc | 3.369±0.711ab | 0.769±0.095a |
| POM | 1.877±0.434a | 2.446±0.936a | 0.727±0.093a |
| 2018-19 | PRM | 2.781±0.277cde | 5.137±1.087cd | 0.865±0.033b |
| MON | 2.654±0.329cd | 4.351±1.470bc | 0.886±0.044b |
| POM | 3.000±0.196de | 5.638±1.040cd | 0.869±0.035b |
| 2019-20 | PRM | 2.999±0.199de | 6.508±1.757d | 0.859±0.084b |
| MON | 2.731±0.265cde | 5.032±1.715cd | 0.887±0.059b |
| POM | 3.083±0.190e | 6.607±1.803d | 0.858±0.060b |

*Values expressed in mean±SD; values with different superscript are significantly different (p<0.05); PRM, Pre-monsoon; MON, Monsoon; POM, Post-monsoon

**Table S3**. Spatial variation in diversity indices

| Year | Station | Hʹ | dʹ | Jʹ |
| --- | --- | --- | --- | --- |
| 2017-18 | Puging | 2.113±0.035abc | 3.147±0.162abc | 0.833±0.089abcd |
| Yingkiong | 1.984±0.355ab | 2.571±0.615ab | 0.751±0.036ae |
| Boleng | 1.622±0.705a | 1.812±1.020a | 0.753±0.121ae |
| Komsing | 2.079±0.210abc | 2.326±0.496a | 0.812±0.048abc |
| Pasighat | 2.493±0.341cd | 3.923±0.746bcd | 0.675±0.094ef |
| Oiramghat | 2.504±0.220cd | 3.889±0.786bcd | 0.660±0.049f |
| 2018-19 | Puging | 2.415±0.273bcd | 3.949±0.784bcd | 0.867±0.019cd |
| Yingkiong | 2.679±0.173de | 4.507±0.461cd | 0.869±0.011cd |
| Boleng | 2.862±0.285def | 4.571±1.037cd | 0.914±0.013d |
| Komsing | 2.726±0.171def | 4.207±1.056cd | 0.910±0.043d |
| Pasighat | 3.081±0.097ef | 6.245±0.232ef | 0.850±0.005bcd |
| Oiramghat | 3.103±0.066ef | 6.769±0.512f | 0.826±0.012abcd |
| 2019-20 | Puging | 2.661±0.224de | 4.650±0.807d | 0.897±0.012cd |
| Yingkiong | 2.912±0.205def | 5.226±0.574de | 0.895±0.024cd |
| Boleng | 3.061±0.345ef | 5.354±1.148de | 0.923±0.001d |
| Komsing | 2.837±0.215def | 4.666±0.942d | 0.921±0.031d |
| Pasighat | 2.921±0.151def | 7.470±0.790f | 0.766±0.039ab |
| Oiramghat | 3.232±0.482f | 8.925±1.760g | 0.803±0.092abc |

*Values expressed in mean±SD; values with different superscript are significantly different (p<0.05)

**Table S4**. PERMANOVA design of fish abundance in Siang River (Supplementary)

| Factors |  | |  |  |  |  |  |  |
| --- | --- | --- | --- | --- | --- | --- | --- | --- |
| Name | Abbrev. | | Type | Levels |  |  |  |  |
| Seasons | season | | Fixed | 3 |  |  |  |  |
| Stations | station | | Fixed | 6 |  |  |  |  |
| PERMANOVA | | | |  |  |  |  |  |
| Source | | df | SS | MS | Pseudo-F | P (perm) | Unique perms | P(MC) |
| Season | | 2 | 7509.2 | 3754.6 | 19.453 | 0.001 | 999 | 0.001 |
| Station | | 5 | 32082 | 6416.4 | 33.244 | 0.001 | 999 | 0.001 |
| Season x Station | | 10 | 3052.1 | 305.21 | 1.5813 | 0.079 | 998 | 0.079 |
| Res | | 18 | 3474.1 | 193.01 |  |  |  |  |
| Total | | 35 | 46118 |  |  |  |  |  |

**Supplementary Figures**

**Fig. S1.** Family-wise % contribution to the total number of species reported from River Siang
